# Supplementary material for: Micronized Palmitoylethanolamide, Hempseed Oil, and Maritime Pine Bark Dry Extract (Pelvipea®) for Pelvic Pain: An In Vitro Study for Urothelial Inflammation Treatment
Source: MDPI journal article supplement (doi:10.3390/cells12040616), 2023-02-14
Supplement: s1 [file s1]

**Supplementary Table S1.** Description of the samples analyzed.

| Sample                                         | Reference order | State  |
|------------------------------------------------|-----------------|--------|
| Micronized PEA powder<br>(EZ00049678)          | 22LA04095       | Powder |
| Hempseed oil<br>(EZ00049037)                   | 22LA04097       | Liquid |
| Maritime pine bark dry extract<br>(EZ00050328) | 22LA04096       | Powder |
| Mixture<br>(VC139)                             | 22LA04073       | Powder |

**Supplementary Table S2.** Comparison between the title measured and the title declared for PEA, procyanidins, and total lipids in the three raw materials.

| Ingredients                                      | Content measured (%) | Content declared (%) |
|--------------------------------------------------|----------------------|----------------------|
| Micronized PEA<br>(PEA)                          | 91.1 ± 9.8           | ≥ 99                 |
| Hempseed oil<br>(total lipids)                   | 99.9                 | 100                  |
| Maritime pine bark dry extract<br>(procyanidins) | 73.6 ± 0.8           | 65-75                |

**Supplementary Table S3.** Expression of GRO  $\alpha$ , GRO  $\alpha/\beta/g$ , and GM-CSF reported as fold-changes compared to control (cells treated with medium conditioned only with the inflammatory stimulus, *E. coli*) after treatment of bladder urothelium cells with the three functional ingredients and their mixture at different concentrations. \*indicates statistical significance set at  $p < 0.05$  for the comparison between the mixture and each ingredient singularly taken..

|                    | Treatment ( $\mu\text{g/mL}$ )       | GRO $\alpha$<br>(Fold-change vs.<br>Control) | GRO $\alpha/\beta/g$<br>(Fold-change vs.<br>Control) | GM-CSF<br>(Fold-change vs.<br>Control) |
|--------------------|--------------------------------------|----------------------------------------------|------------------------------------------------------|----------------------------------------|
| <b>Condition 1</b> | Micronized PEA 600                   | 1.49* $\pm$ 0.06                             | 1.14 $\pm$ 0.04                                      | 1.01 $\pm$ 0.08                        |
|                    | Hempseed oil 75                      | 1.43* $\pm$ 0.03                             | 1.56* $\pm$ 0.06                                     | 1.21 $\pm$ 0.02                        |
|                    | Maritime pine bark dry extract 15    | 1.79* $\pm$ 0.03                             | 1.91* $\pm$ 0.02                                     | 1.39 $\pm$ 0.02                        |
|                    | Mixture 690                          | 0.99 $\pm$ 0.03                              | 1.19 $\pm$ 0.06                                      | 1.10 $\pm$ 0.21                        |
| <b>Condition 2</b> | Micronized PEA 400                   | 0.79* $\pm$ 0.04                             | 0.92* $\pm$ 0.08                                     | 1.10 * $\pm$ 0.11                      |
|                    | Hempseed oil 50                      | 1.04* $\pm$ 0.03                             | 0.98* $\pm$ 0.05                                     | 1.56* $\pm$ 0.09                       |
|                    | Maritime pine bark dry extract 10    | 0.71 $\pm$ 0.16                              | 0.97* $\pm$ 0.13                                     | 0.81* $\pm$ 0.14                       |
|                    | Mixture 460                          | 0.58 $\pm$ 0.06                              | 0.58 $\pm$ 0.04                                      | 0.58 $\pm$ 0.00                        |
| <b>Condition 3</b> | Micronized PEA 200                   | 1.28* $\pm$ 0.05                             | 0.81 $\pm$ 0.23                                      | 0.90 $\pm$ 0.26                        |
|                    | Hempseed oil 25                      | 0.90* $\pm$ 0.13                             | 0.88* $\pm$ 0.04                                     | 1.36* $\pm$ 0.01                       |
|                    | Maritime pine bark dry extract 5     | 1.00* $\pm$ 0.09                             | 1.22* $\pm$ 0.07                                     | 1.19* $\pm$ 0.04                       |
|                    | Mixture 230                          | 0.65 $\pm$ 0.02                              | 0.51 $\pm$ 0.05                                      | 0.57 $\pm$ 0.00                        |
| <b>Condition 4</b> | Micronized PEA 100                   | 1.23* $\pm$ 0.13                             | 0.58 $\pm$ 0.37                                      | 0.21 $\pm$ 0.26                        |
|                    | Hempseed oil 12.5                    | 1.17* $\pm$ 0.09                             | 1.17* $\pm$ 0.08                                     | 1.71* $\pm$ 0.02                       |
|                    | Maritime pine bark dry extract 2.5   | 1.69* $\pm$ 0.28                             | 1.71* $\pm$ 0.27                                     | 1.82* $\pm$ 0.16                       |
|                    | Mixture 115                          | 0.78 $\pm$ 0.01                              | 0.72 $\pm$ 0.02                                      | 0.79 $\pm$ 0.01                        |
| <b>Condition 5</b> | Micronized PEA 50                    | 0.91 $\pm$ 0.03                              | 1.00 $\pm$ 0.08                                      | 1.15 $\pm$ 0.11                        |
|                    | Hempseed oil 6.25                    | 1.23* $\pm$ 0.03                             | 1.16* $\pm$ 0.07                                     | 1.47* $\pm$ 0.05                       |
|                    | Maritime pine bark dry extract 1.25  | 1.75* $\pm$ 0.16                             | 1.44* $\pm$ 0.22                                     | 1.29 $\pm$ 0.14                        |
|                    | Mixture 57.5                         | 0.97 $\pm$ 0.09                              | 0.96 $\pm$ 0.00                                      | 1.31 $\pm$ 0.05                        |
| <b>Condition 6</b> | Micronized PEA 25                    | 1.17 $\pm$ 0.01                              | 1.13 $\pm$ 0.00                                      | 1.19 $\pm$ 0.3                         |
|                    | Hempseed oil 3.125                   | 1.19 $\pm$ 0.04                              | 1.20 $\pm$ 0.07                                      | 1.52 $\pm$ 0.05                        |
|                    | Maritime pine bark dry extract 0.625 | 0.66 $\pm$ 0.03                              | 0.77 $\pm$ 0.07                                      | 1.55 $\pm$ 0.07                        |
|                    | Mixture 28.75                        | 1.33 $\pm$ 0.15                              | 1.35 $\pm$ 0.10                                      | 1.39 $\pm$ 0.10                        |
